# Supplementary figures and images for: Vitreous proteomics, a gateway to improved understanding and stratification of diverse uveitis aetiologies
Source: PubMed Central journal article supplement — Acta Ophthalmol. 2021 Jul 28;100(4):403–13. doi: 10.1111/aos.14993 (PMC9292680; doi:10.1111/aos.14993), 2021-07-28

# Supplementary Figure 1

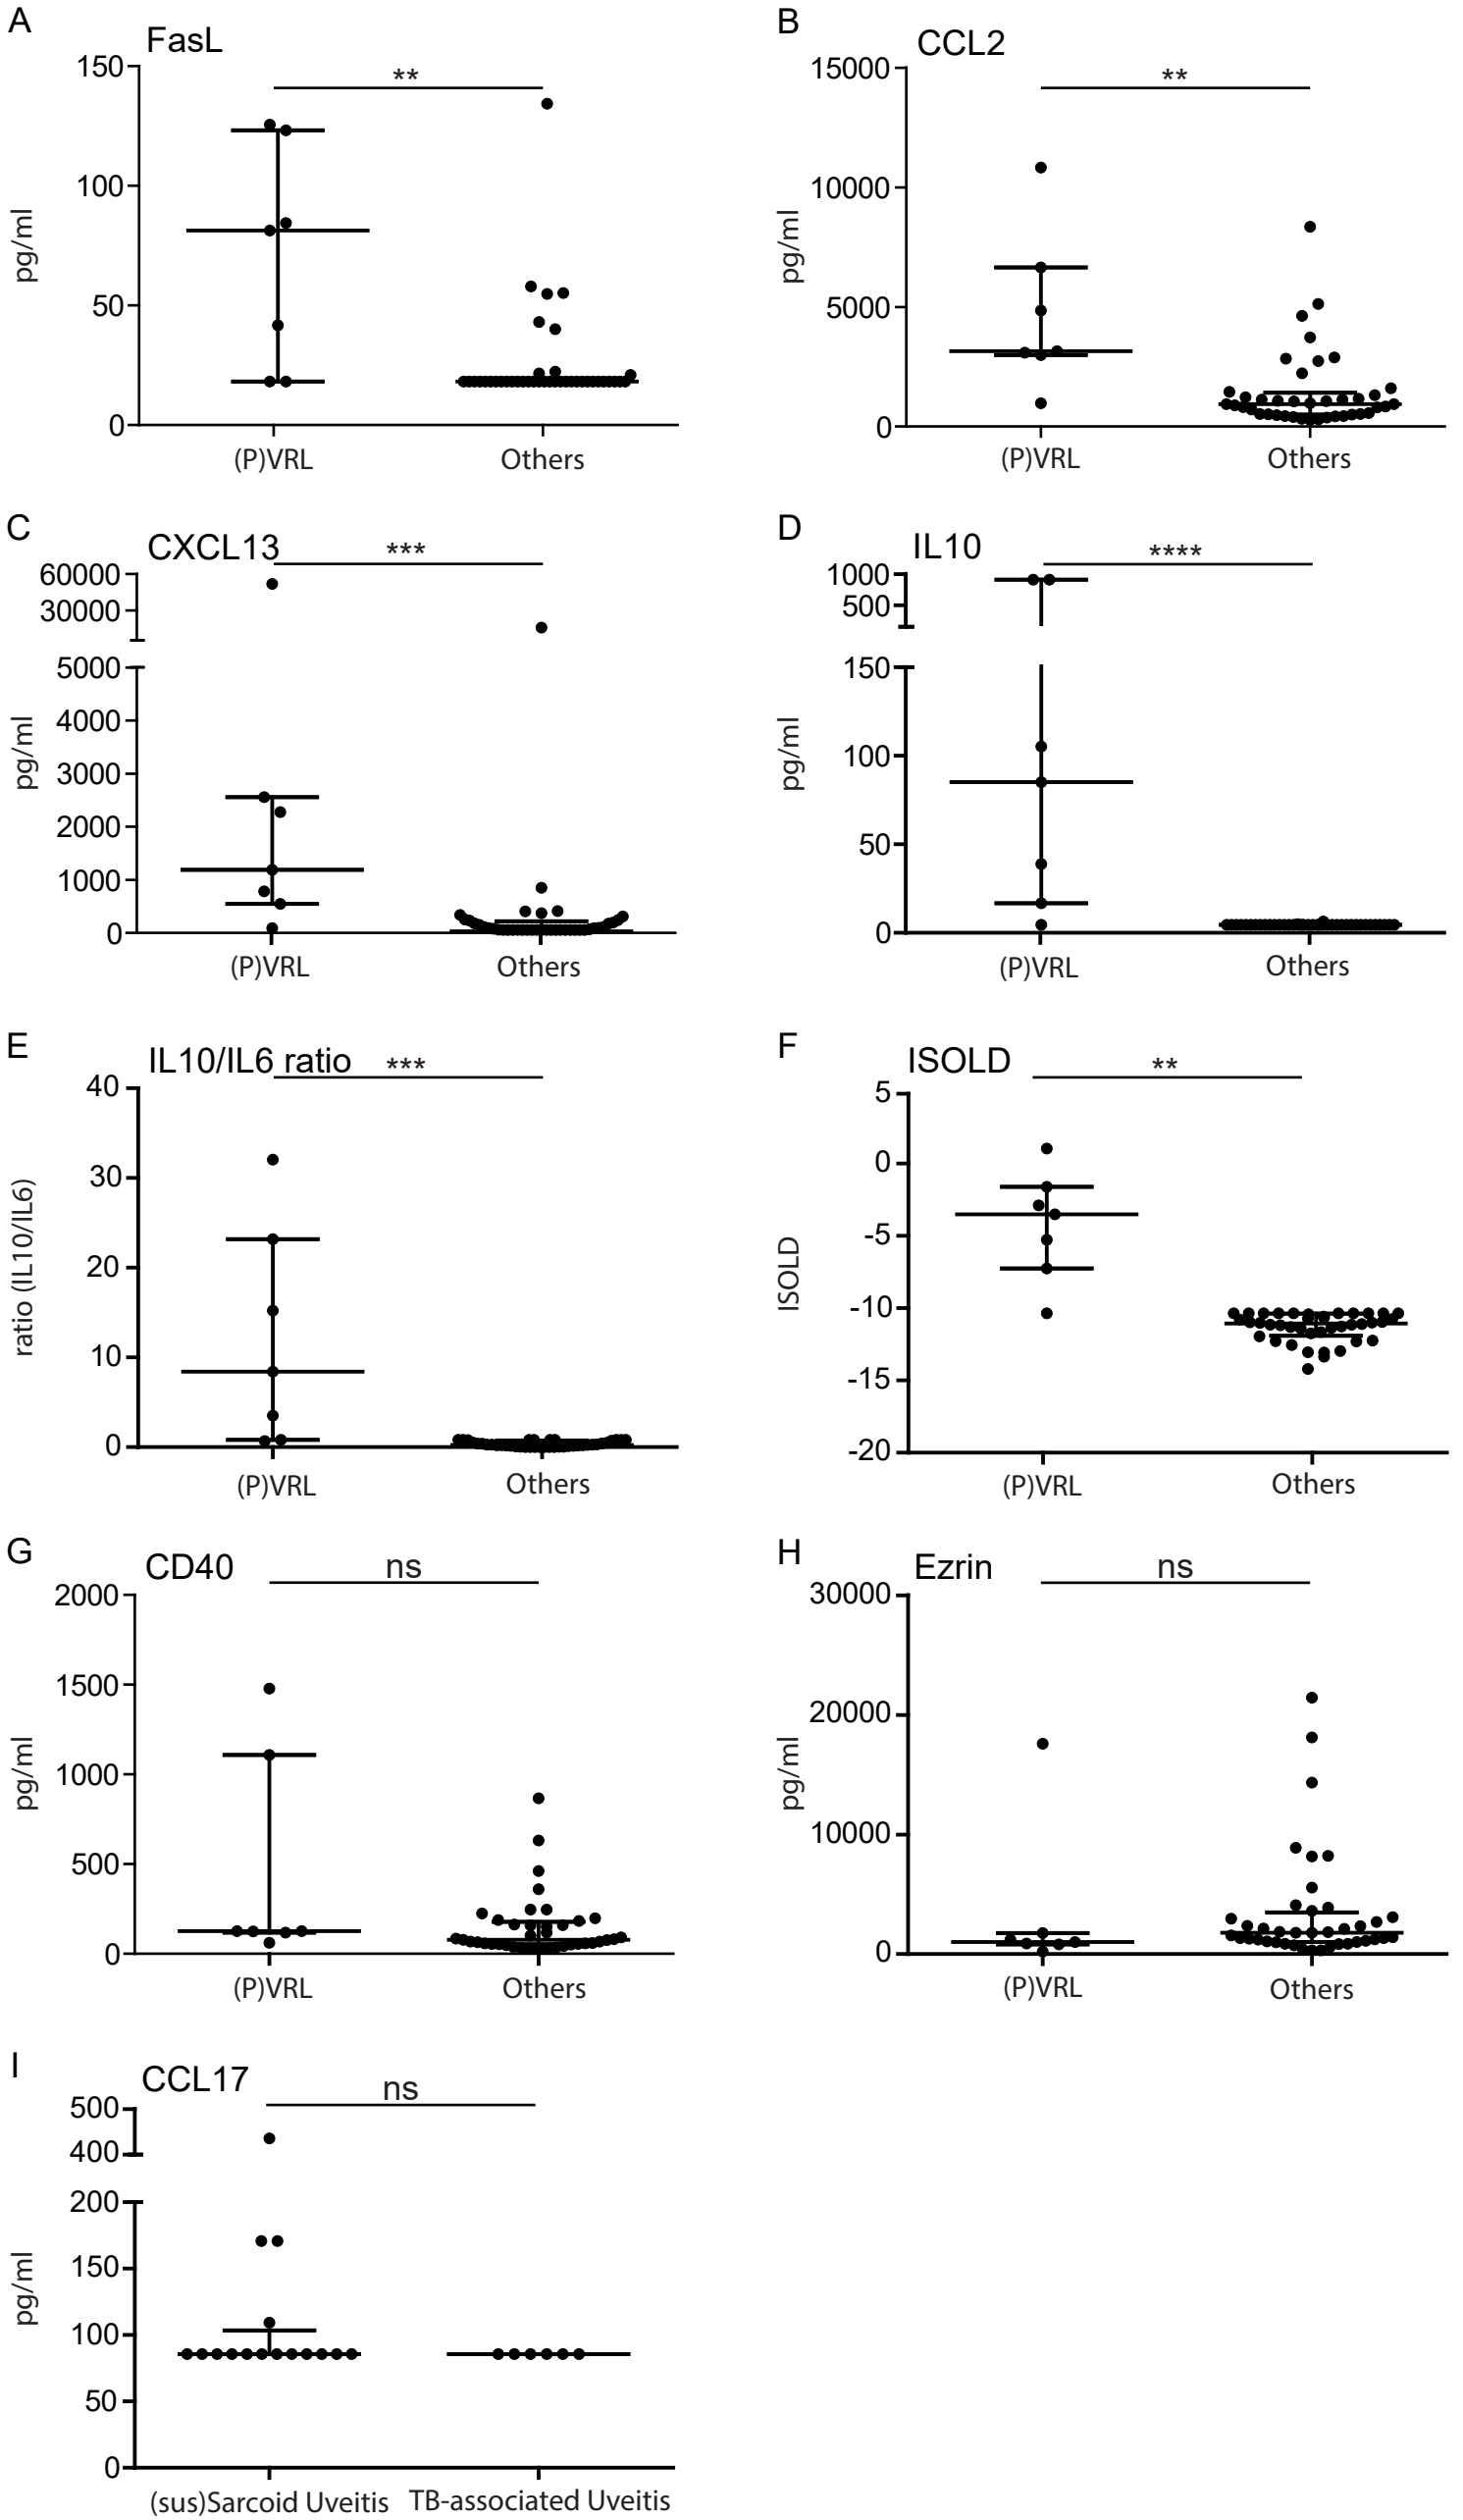

Supplement: AOS-100-403-s002.pdf [file AOS-100-403-s002.pdf]
